# 1 Identification of combinatorial and singular 2 genomic signatures of host adaptation in 3 influenza A H1N1 and H3N2 subtypes

4 Zeeshan Khaliq<sup>1</sup>, Mikael Leijon<sup>2,3</sup>, Sándor Belák<sup>3,4</sup>, Jan Komorowski<sup>1,5,\*</sup>

5 <sup>1</sup> Department of Cell and Molecular Biology, Computational Biology and  
6 Bioinformatics, Science for Life Laboratory, Uppsala University, SE-751 24,  
7 Uppsala, Sweden

8 <sup>2</sup> National Veterinary Institute (SVA), Department of Virology, Parasitology and  
9 Immunobiology (VIP)

10 <sup>3</sup> OIE Collaborating Centre for the Biotechnology-based Diagnosis of Infectious  
11 Diseases in Veterinary Medicine, Ulls väg 2B and 26, SE-756 89 Uppsala, Sweden

12 <sup>4</sup> Swedish University of Agricultural Sciences (SLU), Department of Biomedical  
13 Sciences and Veterinary Public Health (BVF)

14 <sup>5</sup> Institute of Computer Science, Polish Academy of Sciences, 01-248 Warszawa,  
15 Poland

16 \* Corresponding Author

17 Email Addresses:

18 ZK: [zeeshan.khaliq@icm.uu.se](mailto:zeeshan.khaliq@icm.uu.se)

19 ML: [mikael.leijon@sva.se](mailto:mikael.leijon@sva.se)

20 SB: [sandor.belak@slu.se](mailto:sandor.belak@slu.se)

21 JK: [jan.komorowski@icm.uu.se](mailto:jan.komorowski@icm.uu.se)

## 22 **Abstract**

## 23 **Background**

24 The underlying strategies used by influenza A viruses (IAVs) to adapt to new hosts  
 25 while crossing the species barrier are complex and yet to be understood completely.  
 26 Several studies have been published identifying singular genomic signatures that  
 27 indicate such a host switch. The complexity of the problem suggested that in addition  
 28 to the singular signatures, there might be a combinatorial use of such genomic  
 29 features, in nature, defining adaptation to hosts..

## 30 **Results**

31 We used computational rule-based modeling to identify combinatorial sets of  
 32 interacting amino acid (aa) residues in 12 proteins of IAVs of H1N1 and H3N2  
 33 subtypes. We built highly accurate rule-based models for each protein that could  
 34 differentiate between viral aa sequences coming from avian and human hosts, . We  
 35 found 68 combinations of aa residues associated to host adaptation (HAd) on HA,  
 36 M1, M2, NP, NS1, NEP, PA, PA-X, PB1 and PB2 proteins of the H1N1 subtype and  
 37 24 on M1, M2, NEP, PB1 and PB2 proteins of the H3N2 subtypes. In addition to  
 38 these combinations, we found 132 novel singular aa signatures distributed among all  
 39 proteins, including the newly discovered PA-X protein, of both subtypes. We showed  
 40 that HA, NA, NP, NS1, NEP, PA-X and PA proteins of the H1N1 subtype carry  
 41 H1N1-specific and HA, NA, PA-X, PA, PB1-F2 and PB1 of the H3N2 subtype carry  
 42 H3N2-specific HAd signatures. M1, M2, PB1-F2, PB1 and PB2 of H1N1 subtype, in  
 43 addition to H1N1 signatures, also carry H3N2 signatures. Similarly M1, M2, NP,  
 44 NS1, NEP and PB2 of H3N2 subtype were shown to carry both H3N2 and H1N1  
 45 HAd signatures.

## 46 **Conclusions**

47 To sum it up, we computationally constructed simple IF-THEN rule-based models  
 48 that could distinguish between aa sequences of virus particles originating from avian  
 49 and human hosts. From the rules we identified combinations of aa residues as  
 50 signatures facilitating the adaptation to specific hosts. The identification of  
 51 combinatorial aa signatures suggests that the process of adaptation of IAVs to a new  
 52 host is more complex than previously suggested. The present study provides a basis  
 53 for further detailed studies with the aim to elucidate the molecular mechanisms  
 54 providing the foundation for the adaptation process.

## 55 **Keywords**

56 Influenza A virus, Host specificity, combinatorial signatures, MCFS, Rosetta, Rough  
 57 sets.

## 58 **Background**

59 IAVs have been known for a long time to cause disease in a wide range of host  
 60 species, including humans and various animals. The IAVs are zoonotic pathogens that  
 61 can infect a broad range of animals from birds to pigs and humans. The interspecies  
 62 transmission requires that IAVs adapt to the new host and the whole process is  
 63 facilitated by their high mutation rates [1]. This can result in epidemics and  
 64 pandemics with severe consequences for both human and animal life. In addition to  
 65 the yearly epidemics that has proved fatal for at least 250,000 humans worldwide, in  
 66 the 20<sup>th</sup> century alone [2], there has been at least five major pandemics; the Spanish  
 67 flu of 1918, Asian influenza of 1957, Hong Kong influenza of 1968, the age restricted  
 68 milder Russian flu of the 1977 [3, 4] and the Swine flu of 2009. Thus, new flu  
 69 epidemics and pandemics are a constant threat. Given our poor understanding of the

70 HAd process of the virus, which can be a major factor for such epidemics and  
 71 pandemics, it is very hard to predict the type of the virus that will cause the coming  
 72 outbreaks.

73 The IAVs are usually classified into subgroups based on the two surface glycol-  
 74 proteins, hemagglutinin (HA) and neuraminidase (NA). To date, 18 types of HA (H1-  
 75 H18) and 11 types of NA (N1-N11) are known [5-7]. Most of these species have wild  
 76 birds as their natural hosts. IAVs are usually adapted and relatively restricted to a  
 77 single host but occasionally the virus can jump and adapt to a new host species. This  
 78 cross of the species barrier is proved by the pandemic H1N1, H3N2, H2N2 and the  
 79 most recent H5N1 and H7N9 subtype outbreaks, which are thought to have evolved  
 80 from avian or porcine sources [8, 9, 5].

81 The HA protein plays a crucial part in defining the adaptation of the virus to different  
 82 hosts since it binds to the receptor providing the entry into host cells. The avian  
 83 strains of the IAVs are known to prefer a receptor with  $\alpha$ 2,3-sialic acid linkages while  
 84 the human strains have a preference for a receptor with  $\alpha$ 2,6-sialic acid linkages [10].  
 85 However, other proteins such as the polymerase subunits have also previously been  
 86 shown to play a role in the adaptation of IAVs to different hosts [11, 12].

87 Computational methods, like artificial neural networks, support vector machines and  
 88 random forests, have been used previously to predict hosts of IAVs [13-15].  
 89 Furthermore, several other studies have previously been carried out predicting  
 90 genomic signatures specifying different hosts, both computationally and  
 91 experimentally [16-22]. Amino acid changes taken one at a time, i.e. singular aa  
 92 changes), in viral protein sequences between different hosts have been reported by  
 93 these studies as host-specific signatures, either directly or indirectly facilitating the  
 94 HAd process. Despite these findings, this process of adaptation of IAVs in different

95 hosts is still not completely understood. Given the complex nature of the problem we  
 96 suspected that the HAd signatures are not necessarily univariate. Essentially, in  
 97 addition to the proven effects of singular aa residues, there might be a combinatorial  
 98 use of aa residues in nature that affect the adaptation of IAVs to new hosts.  
 99 To this end, for both H1N1 and H3N2 subtypes, we analyzed aa sequences of 12  
 100 proteins expressed by the viruses. We built high quality rule-based models, based on  
 101 rough sets [23], for each of the 12 proteins, predicting hosts from protein sequences.  
 102 The models consisted of simple IF-THEN rules that lend themselves to easy  
 103 interpretation. The combinations of aa residues used by the rules were identified as  
 104 HAd signatures. In additions to such combinatorial signatures, novel singular  
 105 signatures were also identified from the rules. The singular and, especially, the  
 106 combinatorial signatures provide novel insights into the complex HAd process of the  
 107 IAVs.

## 108 **Results**

### 109 **Feature selection reduces the number of features needed to discern** 110 **between hosts**

111 Monte Carlo Feature Selection (MCFS) [24] was used to obtain a ranked list of  
 112 significant features, here significantly informative aa positions in all the proteins for  
 113 both subtypes, that best discern between the hosts. This step helped us remove any  
 114 kind of noise that could have been in the data. More importantly, the use of MCFS  
 115 considerably reduced the number of aa positions to be analyzed further, as shown in  
 116 Table 1. The HA protein had 628 positions to start with and after running MCFS on  
 117 the data, we were left with 115 and 88 positions for H1N1 and H3N2 subtypes,

118 respectively (81.7% and 86% reduction in the number aa positions). On average there  
119 was a 79.8% reduction in the number of aa positions across all the proteins for H1N1  
120 subtype and 82.8% for the H3N2 subtype (Table 1). Only the significant features were  
121 used for further analysis in this study. The ranked lists of the significant features are  
122 provided as a supplementary file (see Additional file 1).

### 123 **Rule-based models for each protein**

124 Since the number of sequences belonging to human and avian hosts were not balanced  
125 in the training data of either subtype (Table 1), we balanced the data sets by a method  
126 called under-sampling, as described in detail in Methods. For data sets of each protein  
127 and each subtype we created 100 under-sampled subsets. Each of these subsets was  
128 used to build a classifier, consisting of IF-THEN rules, whose performance was  
129 assessed by a 10-fold cross-validation. Mean accuracies of the 100 classifiers were  
130 averaged and shown in Figure 1. HA classifiers for H1N1 and non-structural protein 1  
131 (NS1) classifiers for H3N2 subtypes were the best ones with a mean accuracy of 98%  
132 and 98.9%, respectively. Nuclear export protein (NEP) classifiers of the H1N1  
133 subtype and matrix protein 1 (M1) classifiers of the H3N2 subtype had lowest mean  
134 accuracy of 83.4% and 88.8%, respectively, which is still a very good result.  
135 For each protein of each subtype a single rule-based model containing only the most  
136 significant rules from their respective 100 classifiers was inferred (Methods). We then  
137 reclassified the training data of each protein with its respective rule-based model to  
138 get an idea of its performance in terms of classification of human and avian  
139 sequences. Polymerase acidic protein X (PA-X), which is a frame-shift product of the  
140 third RNA segment, HA and NEP (NS2) models performed the best (Mathew's  
141 correlation coefficient (MCC) = 1, MCC = 0.99, MCC = 0.99, respectively) among  
142 the H3N2 models while HA, NA and NS1 models performed the best among the

143 H1N1 models (MCC = 0.96, MCC = 0.95, MCC = 0.95, respectively) (Figure 2). The  
144 poorest of the H1N1 models was the PA-X protein model (MCC = 0.86) and of the  
145 H3N2 models was the polymerase basic protein F2 (PB1-F2) protein model (MCC =  
146 0.86). The complete HA H1N1 rule-based model is shown in Table 2. Models for the  
147 remaining proteins for both subtypes are provided as supplementary material  
148 (Additional file 2).

149 To further verify the validity of the rule-based models created, we tested them on  
150 new, unseen data. This data was protein sequences published at the NCBI resource  
151 between 30<sup>th</sup> of November 2014 and 16<sup>th</sup> of April 2015. For the H1N1 subtype, the  
152 rule-based models of M1, nucleoprotein (NP), NS1, NEP (also called non-structural  
153 protein 2 (NS2)), PB1-F2, polymerase basic protein 1 (PB1) and polymerase basic  
154 protein 2 (PB2) provided perfect classification (i.e. all the sequences were correctly  
155 classified). For the H3N2 subtype data, the models of HA, M1, NP, NS1, NEP (NS2),  
156 polymerase acidic protein (PA), PB1 and PB2 also gave a perfect classification. Table  
157 3 shows the performance of all rule-based models on the unseen data. A list of names  
158 of the viruses that could not be classified or were miss-classified for both subtypes is  
159 given in Additional file 3.

## 160 **Predicted signatures of HAd**

161 The rule-based models allowed us to further interpret them and see how they  
162 differentiated viral avian from viral human sequences. Each of the models was  
163 analyzed separately for HAd signatures. The constituent rules of a model associated  
164 aa residues at specific positions with an avian or human host. The confidence in these  
165 associations is shown as the accuracy, support and the decision coverage shown in the  
166 rule-based models. For the combinations in our models we also calculated a  
167 combinatorial accuracy gain (CAG), which is the percentage points gain in accuracy

168 of the combination as compared to the average of the accuracies of its constituent  
169 singular conditions when taken independently.

#### 170 **Combinatorial signatures**

171 As expected we found aa combinations in HA, M1, matrix protein 2 (M2), NP, NS1,  
172 NEP (NS2), PA, PA-X, PB1 and PB2 proteins to be associated with specific hosts in  
173 the H1N1 subtype. In the H3N2 subtype, we found combinations in M1, M2, NEP,  
174 PB1 and PB2 proteins. A complete set of combinations for both subtypes is given in a  
175 supplementary file (see Additional file 4: Combinations\_from\_rules). Ciruvis  
176 diagrams [25] for visualization of combinations of interacting amino acids were used  
177 to illustrate the cases of three or more combinations in the models of both subtypes  
178 associated with the avian hosts (see Figure 3 and Figure 4).  
179 Residues 14G of the M2 H1N1 model and 82N of the PB2 H3N2 model were the  
180 most connected ones interacting with six other aa residues each. Amino acid residues  
181 having interactions with more than one other residue, in both the subtypes are listed in  
182 Table 4. These strongly interacting residues might be relatively more essential to HAd  
183 than the less connected ones.

#### 184 **Singular (linear) signatures**

185 Previous studies [16-22] mostly found the adaptation signatures on the internal  
186 proteins and did not look into surface glycoproteins (HA and NA). In contrast, we  
187 found singular signatures on all the proteins of both subtypes, including the HA, NA  
188 and the newly discovered PA-X proteins. PA-X protein shares the human signature  
189 85I with PA in the H1N1 model while it shares human signatures 28L and avian  
190 signature 28P in the H3N2 models. In total, 189 singular signatures were found, in  
191 both subtypes combined. Out of these, 132 signatures were novel and not reported by



the previous studies (Table 5). A complete list of singular signatures is given in the supplementary material (see Additional file 4: singletons\_H3N2, singletons\_H1N1)

#### **Specific aa changes associated with HAd**

Some of the rules from our models associated different residues at the same aa positions with avian and human hosts. This can be seen as a mutation (aa change) associated to the adaptation of the viral proteins to a specific host. Eight mutations were found for the H1N1 subtype and 10 for the H3N2 one. In the H1N1 subtype, mutations F6V in HA, P46T and L74V in NA, I6M in both NS1 and NEP and L58- in PB1-F2 were novel. In the H3N2 subtype, mutations R78E in HA, A30I, N40Y and I44S in NA, P28L and R57Q in PA and P28L in PA-X were not identified in the previous studies. Table 6 shows all such mutations in both subtypes.

#### **Predicted signatures are not specific to sub-clades of the strains**

The support and the decision coverage of the rules showed whether the aa signatures identified were specific to sub-clades or were more general i.e. spread out across the sub-clades. The higher decision coverage indicated more generality of the rule. For example, the top five rules for the avian class have the following very high decision coverage: rule1 – 98.5%, rule2 – 98.5%, rule3 – 97.8%, rule4 – 98.5% and rule5 – 97.8%. It follows that the rules are general. To further illustrate this generality, and to show the diversity in our training data set, a phylogenetic analysis was carried out (additional file 5). Top five rules specifying each host were mapped onto the created phylogenetic trees, separately for each host, for all the proteins of both subtypes. As an example, consider the avian PB2 H3N2 tree (Figure 5). 91.4% of the sequences are covered by rule 1, 2, 3, 4 and 5, which is illustrated by the violet coloring of the leaves in the tree. Only, 1.4% of the sequences are not covered by

rule4, yet they are covered by rule 1, 2, 3, and 5, and similarly for the remaining coverage. For the corresponding human tree, the figures are 89.3% coverage for the top five human rules. One can see that this generality prevails in all other proteins.

## Validity of HAd signatures across H1N1 and H3N2 subtypes

To see whether the signatures associated with HAd identified in the H1N1 subtype could also function as signatures for the H3N2 subtype and vice versa, we classified H3N2 subtype data with H1N1 models and H1N1 subtype data with H3N2 models. Good classifications meant that the rules (and consequently the signatures associated to adaptation) generated for one subtype were valid for the other one. Bad classifications meant that the rules of one subtype did not hold for the data of the other subtype and hence no cross-subtype marker validity. Both HA and NA H1N1 models were bad classifiers for the HA and NA of the H3N2 type data, respectively since they failed to distinguish avian sequences in the data in both cases ( $Sp = 0$ ) (Table 7). It should be kept in mind that the outcome *human* was considered positive outcome and the outcome *avian* considered as a negative one. The PA-X H1N1 model could not recognize human sequences in the PA-X H3N2 data ( $Sn = 0$ ). Furthermore, the models of PA, PB1-F2 and PB1 proteins of H1N1 subtype were bad classifiers of the H3N2 data ( $MCC = -0.11$ ,  $MCC = 0.056$ ,  $MCC = 0.302$ ), specifically failing to identify sequences coming from human hosts ( $Sn = 0.021$ ,  $Sn = 0.023$ ,  $Sn = 0.563$ ). This meant that H1N1 HAd signatures in the models of HA, NA, PA-X, PA, PB1-F2 and PB1 proteins were not valid for H3N2 subtype data and these proteins of the H3N2 subtype carried only H3N2-specific HAd signatures. Contrary to this, the H1N1 models of M1, M2, NP, NS1, NEP and PB2 proteins were able to distinguish between H3N2 subtype sequences coming from avian and human sources reasonably well ( $Sn = 0.97-1.0$ ;  $Sp = 0.64-0.94$ ;  $MCC = 0.776-0.941$ ). It proved that these

241 proteins of the H3N2 subtype, in addition to the stronger H3N2 HAd signatures, also  
 242 carried H1N1 HAd signatures.

243 The H3N2 models of HA, NA, NP, NS1, NEP, PA-X and PA proteins could not  
 244 classify avian and human sequences of H1N1 subtype correctly (MCC = -0.004–  
 245 0.251). This means that these proteins of the H1N1 subtype carried H1N1-specific  
 246 signatures. Whereas the successful classifications of H1N1 subtype data of M1, M2,  
 247 PB1-F2, PB1 and PB2 proteins by the respective H3N2 models (MCC = 0.788–0.888;  
 248 Sn = 0.956–0.992; Sp = 0.766–0.951) proved that these H1N1 proteins carried both  
 249 H1N1 and H3N2 signatures.

## 250 Discussion

251 In this study we have focused on H1N1 and H3N2 and restricted our analyses to these  
 252 two subtypes. Our models performed reasonably well since all of them had an average  
 253 accuracy of more than 90% in the 10-fold cross validation except NEP (NS2), M1 and  
 254 M2 protein models of the H1N1 type (Accuracy: 83.4%, 87.7% and 87.6%,  
 255 respectively) and M1 protein model of the H3N2 type (Accuracy 88.8%) (Figure 1).  
 256 The reason for the relatively low accuracies of the above exceptions could be either  
 257 the lack of training sequences from which the models learn or these sequences may  
 258 lack stronger genomic signatures specific to hosts.

259 In previous studies [16-22], signatures of adaptation were mostly found on the  
 260 internal proteins, especially in viral ribonucleoprotein complexes consisting of viral  
 261 polymerases and NP. The fact that we were able to build high quality models for all  
 262 the proteins for both subtypes, indicated that all the proteins, including the highly  
 263 variable HA and NA proteins and the recently discovered PA-X protein, carry  
 264 genomic signatures specific to hosts. A major difference between our models and the

265 ones previously reported is that the previous models were black box classifiers  
 266 whereas our models are transparent. Black box classifiers give classification but do  
 267 not provide any straightforward possibility to identify which parameters and for  
 268 which values a classification is obtained. Transparent classifiers allow explicit  
 269 analysis of the model, i.e. the features and their values, for each classified object. The  
 270 models created in this study used aa positions as features and aa residues at those  
 271 positions as the values for those features, hence lending themselves for easy  
 272 interpretation and further analysis.

273 Previous studies listed above reported only on singular aa positions as HAd  
 274 signatures. However, in addition to singular aa positions, we also identified  
 275 combinations of aa residues at specific positions as HAd signatures. This is the very  
 276 first time that combinations of aa positions are reported in this context. These  
 277 combinations are shown as conjunctive rules, i.e., rules with more than one condition  
 278 in the IF part. It appeared that some aa residues were part of more than one  
 279 combination in our models. This may suggest that these residues are relatively more  
 280 important in establishing HAd then the ones appearing in one combination only  
 281 (Table 4).

282 In the M2 H1N1 model, the combinations associated with avian hosts had a Glycine  
 283 (G) residue at position 14 while the combinations for human hosts had a Glutamic  
 284 acid (E) in the same position. Similarly, in PB2 H3N2 model, Arginine (R) at position  
 285 340 was associated to avian hosts while Lysine (K) residue at the same position to  
 286 human hosts. It seems that the mutations G14E in M2 H1N1 and R340K in PB2  
 287 H3N2 model facilitate the shift of hosts from avian to human. However, these  
 288 residues always appear in combination with other residues and therefore they cannot  
 289 be used in forms other than the combinations themselves. The reason is obvious. The

confidence measures (accuracy, support and decision-coverage) were calculated for the combination as a whole. We do not report such mutations in our list of mutations affecting HAd although they indicate an effect. The functions of these combinations at a molecular level are not understood yet, but they provide a novel and interesting perspective of looking at sequence based HAd signatures.

HA and NA of both subtypes were found to be only carrying subtype-specific signatures. This goes well with the current knowledge that these two proteins are the most diverse proteins that are specifically adapted to interact with the host cell. M1, M2 and PB2 are shown to be the most conserved proteins from the point of view of host specifying genomic signatures since they carried the host signatures valid for both subtypes.

The signatures found in this study were also considered in other contexts in other studies such as viral viability and antiviral resistances. For instance, positions 30, 142, 207 and 209 occurring in the H1N1 M1 models have been previously shown to affect viral production when mutated [26], while mutation S31N derived from M2 models is a known marker of amantadine resistance [27-30]. Table 8 lists all the aa residues and their descriptions as found in different contexts in the literature. All these different contexts, that the aa residues from our models are described in, show that they affect the fitness of the viruses in one or the other way, which in turn facilitates their adaptation to the new environment or hosts.

## Conclusions

The highly predictive rule-based models built for 12 proteins for H1N1 and H3N2 subtypes suggest that there are HAd signatures on all the protein including the diverse HA, NA and the newly discovered PA-X protein that were not previously studied in

314 this context. In addition, the transparent nature of our method allowed us to further  
 315 investigate our models for how the predictions are actually done. This resulted in a list  
 316 of aa residues and their combinations associated with host specificity. Some of the aa  
 317 residues identified in this study were already known while others are novel. The  
 318 ability of our methods to capture the combinatorial nature of the HAd process makes  
 319 this study unique in its nature. We discovered that the surface proteins HA and NA  
 320 carry subtype-specific host signatures in both subtypes while NP, NS1, NEP, PA-X  
 321 and PA of the H1N1 subtype and PA-X, PA, PB1-F2 and PB1 of the H3N2 subtype  
 322 carry subtype-specific host signatures. We showed that M1, M2, PB1-F2, PB1 and  
 323 PB2 of the H1N1 subtype carried H1N1 and some additional H3N2 signatures, and  
 324 vice versa, M1, M2, NP, NS1, NEP and PB2 of the H3N2 subtype carried H3N2 and  
 325 some additional H1N1 host signatures. The computational results presented here will  
 326 eventually require further analysis by testing the host-pathogen interactions under  
 327 laboratory conditions. We believe that the computational analyses provide important  
 328 support in the characterization of host-pathogen interactions and the proper  
 329 combination of *in silico* and *in vitro* (probably even *in vivo*) studies will yield  
 330 important novel information concerning the infection biology of various viruses and  
 331 other infectious agents.

## 332 **Methods**

333 The combined feature selection – rule-based modeling methodology used in this is  
 334 similar to our previous work where we identified a complete map of potential  
 335 pathogenicity markers in the H5N1 subtype of the avian influenza A viruses [31].

## 336 **Data**

337 The data used to make the models was downloaded from the NCBI flu database found  
 338 at <http://www.ncbi.nlm.nih.gov/genomes/FLU/Database/nph-select.cgi?go=database>  
 339 [32]. Full-length plus (nearly complete, may only miss the start and stop codons)  
 340 protein sequences of the twelve proteins namely, HA, NA, NP, M1, M2, NS1, NEP  
 341 (NS2), PA, PA-X, PB1, PB2 and PB1-F2, were separately downloaded as published  
 342 up till November 30, 2014. Identical sequences were represented by the oldest  
 343 sequence in the database. For each protein, sequences of the H3N2 and H1N1  
 344 subtypes of avian and human hosts were downloaded. Sequences of the mixed  
 345 subtypes were not included in this study. Table 1 shows the number of sequences for  
 346 each of the proteins for each subtype. For each protein we combined the sequences of  
 347 the two subtypes used in this study into a single file and aligned them with MUSCLE  
 348 (v3.8.31) [33].

## 349 **Decision Tables**

350 A decision table was created for each of the proteins for both the subtypes. A decision  
 351 table can be seen as a tabularized form of the aligned FASTA sequences with an extra  
 352 decision/label column, which in our case was the host information. The first column  
 353 of the decision tables contained the identifier of the sequence, and the last column was  
 354 the label/outcome column, the host information in our case and the rest of the  
 355 columns represented the sequence information corresponding to the aligned FASTA  
 356 files. The alignment gaps were represented by a '?' in the decision tables. The rows of  
 357 a decision table were called objects each representing a particular aa sequence and a  
 358 label. Columns other than the first and the last one were the features.

## 359 **Feature selection**

360 MCFS, as described in [24], was used to rank the features of the decision tables with  
 361 respect to their ability to discern between avian and human hosts. MCFS is  
 362 implemented as a software package dmLab [34]. MCFS uses a large number of  
 363 decision trees and assigns a normalized relative importance (RI-norm) score to each  
 364 feature such that the features contributing more to the discernibility of the outcome  
 365 gets a higher score. Statistical significance of the RI-norm scores was assessed with a  
 366 permutation test and significant features ( $p < 0.05$ ), after Bonferroni correction [35],  
 367 were kept as described in [36]. Only these features were used in the further rule-based  
 368 model generation.

## 369 **Under-sampling the data sets**

370 In the training data for both subtypes, the number of sequences from human hosts was  
 371 considerably higher than that from the avian hosts. It has previously been shown that  
 372 this imbalance affects the learning in favor of the dominating class [37]. However to  
 373 address this problem one can artificially balance the classes [38]. To this end, a  
 374 technique called under-sampling was used where the sequences belonging to the  
 375 dominating class were randomly sampled equal to the class having the lesser number  
 376 of sequences and repeated this step 100 times. In this way for each protein and for  
 377 each subtype we created 100 subsets where the number of sequences belonging to  
 378 human and avian hosts were equal. A single rule-based classifier was inferred from  
 379 each of the subsets, which resulted in 200 classifiers per protein. We illustrate the  
 380 process with the following example.

381 The data set of the NA protein of the H1N1 subtype had 3093 human and 205 avian  
 382 sequences, which was a significant imbalance in the number of sequences. From the



human set we created subsets by randomly extracting 100 times 205 human sequences and joining them with the 205 avian sequences to create 100 subsets.

### Rough sets and rule-based model generation

Rough set theory [23] was used to produce minimal sets of features that can discern between the objects belonging to different decision classes. ROSETTA [39], a publicly available software system that implements rough sets theory, was used to transform the minimal sets of features into rule-based models [40] that consisted of simple IF-THEN rules. A complete description of rough sets can be found in [41] and the combined MCFS-ROSETTA approach to model generation in bioinformatics is described in [42].

The input data to ROSETTA were the balanced decision tables created in the previous step with only the significant features obtained from applying MCFS. ROSETTA computed approximately minimal subsets of feature combinations that discerned between avian and human hosts with the Johnsons algorithm implemented in ROSETTA. The classifiers were collections of IF-THEN rules. A sample rule from the HA-H1N1 model:

| Rule                                 | Accuracy (%) | Support | Decision Coverage(%) |
|--------------------------------------|--------------|---------|----------------------|
| IF P200=P AND P222=K THEN host=Avian | 91.3         | 229     | 97.7                 |

reads as: “**IF** at position 200 there is a Proline residue **AND** at position 222 there is a Lysine residue **THEN** the sequence is from an avian host”.

There is additional information about the rules available. *Support* is the set of sequences (229 sequences) that satisfy the conditions of the left hand side (LHS), i.e. the set of sequences that have a proline residue at position 200 and a lysine residue at position 222. For this rule, *Accuracy* is 91.3% that is the proportion of correctly

classified sequences to the total number of supporting sequences (209/229). Human sequences are considered positive and avian as negatives in this study. The decision coverage for this rule is 97.7%, which means it correctly classifies 97.7% of the total avian sequences used to train the classifier. It is calculated as follows:

$$Decision\ Coverage\ (\%) = \left( \frac{Accuracy \times Support}{Total\ training\ objects\ of\ the\ decision\ class} \right) \times 100$$

$Accuracy \times Support$  gives us the total number of sequences that are correctly classified by the rule. Since the rule is for the avian decision class, the total number of avian sequences used to train the classifier was 214. So for the stated rule the decision coverage will be  $((0.913 \times 229) / 214) \times 100$ , which is equal to 97.7%. The above rule is a conjunctive rule since there is a conjunction of conditions ( $P200=P$  AND  $P222=K$ ) in the left hand side (LHS) of the rule. A conjunctive rule captures the underlying combinatorial nature of the HAd process. Each conjunctive rule must always be used as combination only, because the support, accuracy and the decision coverage measures are calculated for the conjunction and not for the individual conjuncts. A rule can also be a singleton rule where LHS consists of only a single condition. The confidence in these classifiers come from the 10-fold cross validation performed in ROSETTA. In a 10-fold cross validation step the input data set is randomly divided into ten equal subsets, say  $\{P1, \dots, P10\}$ . A classifier is trained on the first nine subsets  $\{P1, \dots, P9\}$  and then tested on the remaining,  $P10$  subset. In the next run, another classifier is trained on  $\{P1, \dots, P8, P10\}$  and its performance is tested on the remaining subset, this time  $P9$ . Notice that each time the test set is a different one. The process is repeated 10 times and by then each subset has been used once as a test set. The performance of all the classifiers is averaged and presented as a cross-validation accuracy. Such a validation is quite common in machine learning since one

429 becomes more or less assured that the performance of the classifier was not simply by  
430 chance.

### 431 **Extraction of a single rule-based model for each protein**

432 Rules from all the 100 classifiers were combined into a single file. Duplicates were  
433 removed. Among partially identical rules, the one with the highest decision coverage  
434 was kept. If the difference of decision coverage was lower than 1% then the shortest  
435 (the rule with least conditions) was kept. Accuracy, support and decision coverage  
436 were calculated on the complete data set for all the rules. Rules that were below the  
437 90% accuracy and 30% decision coverage thresholds were discarded. In this way we  
438 extracted a single, high quality rule-based model for each of the protein for both  
439 H1N1 and H3N2 subtype data.

### 440 **Classification of sequences**

441 In order to classify a sequence, each rule from the model was applied on it. If the  
442 conditions of the rule matched the sequence, the rule was said to fire on the sequence.  
443 Every fired rule voted for a particular classification specified by its THEN-part. The  
444 number of votes a fired rule casted was the accuracy multiplied by the support of the  
445 rule. For a sequence several rules may fire, each casting votes in favor of the class in  
446 the THEN-part. The final classification was assigned based on the majority of votes.  
447 Consider the rules:

- 448 In case of 1) IF P70=S THEN host=Avian. Acc=94.0% Supp=50  
449 2) IF P14=M and P32=I THEN host=Avian. Acc=93.0% Supp=43  
450 3) IF P14=L THEN host=Human. Acc=100% Supp=285  
451 4) IF P57=L THEN host=Human. Acc=100% Supp=273

452 Now let us assume that these four rules are applied to a sequence and it turns out that  
 453 Rule 2, 3 and 4 fire for this sequence. Rule 2 will cast 40 ( $0.93 \times 43$ ) votes for class  
 454 Avian while rule 2 and rule 3 will cast 285 and 273 votes in favor of class Human. So,  
 455 the sequence will be classified as class Human since the number of votes is 558  
 456 versus 40.  
 457 In case of no rules fired or there was a tie in the votes, the sequences were labeled as  
 458 unknown.

### 459 **Performance evaluation statistics of the rule-based models**

460 In this study the outcome *human* was considered as a positive outcome and outcome  
 461 *avian* was considered as a negative one. True positives (TP) were sequences correctly  
 462 classified as coming from human hosts. True negatives (TN) were sequences correctly  
 463 classified as coming from avian hosts. False positives (FP) were actually avian  
 464 sequences but incorrectly classified as human sequences and false negatives (FN)  
 465 were actually human sequences that were incorrectly classified as avian sequences.  
 466 The performance of the models for all the proteins for both H1N1 and H3N2 was  
 467 assessed by the following statistics.  
 468 Sensitivity: it is also known as the true positive rate (TPR). In our case, rate at which  
 469 a model correctly identifies sequences coming from a human host is the sensitivity i.e.  
 470 a sequence originally from human host and classified as coming from human hosts by  
 471 the model. It is calculated with the following formula:

$$Sensitivity (Sn) = \frac{TP}{(TP + FN)}$$

472 Specificity: Also known as the true negative rate (TNR). The rate at which the model  
 473 correctly identifies avian sequences is the specificity, which is calculated by:

$$Specificity (Sp) = \frac{TN}{(FP + TN)}$$

474 Mathew's correlation coefficient: It is a measure of how well a model classifies as a  
475 whole. The difference with accuracy is that unlike accuracy Mathew's correlation  
476 coefficient is not effected by un-balanced data and hence gives a better overall idea of  
477 how well the model is classifying. It is calculated by the following formula:

*Mathews correlation coefficient (MCC)*

$$= \frac{(TP \times TN) - (FP \times FN)}{\sqrt{(TP + FP) \times (TP + FN) \times (TN + FP) \times (TN + FN)}}$$

## 478 **From alignment positions to true positions**

479 In this study the aa positions for all the H3N2 proteins except the PB1-F2 corresponds  
480 to the positions of the *A/Victoria/JY2/1968* virus. For all but PB1-F2 proteins of the  
481 H1N1 data, the positions shown in this study correspond to positions on the  
482 *A/Wisconsin/301/1976* virus. The PB1-F2 protein for both viruses is in a truncated  
483 form and we wanted to show positions from a full-length protein. For this reason we  
484 mapped the PB1-F2 H3N2 positions to the PB1-F2 of the *A/New York/674/1995* virus  
485 and the PB1-F2 H1N1 positions to full-length PB1-F2 of the *A/duck/Korea/372/2009*  
486 virus.

## 487 **Phylogenetic analysis**

488 FastTree 2.1.8 [43] was used to create the phylogeny trees.

## 489 **Scripting programming language**

490 Python was used for scripting purposes.

## 491 **List of abbreviations**

492 aa: Amino acids

493 CAG: Combinatorial accuracy gain

494 HA: Hemagglutinin

495 IAVs: Influenza A viruses

496 LHS: Left hand side

497 M1: Matrix protein 1

498 M2: Matrix protein 2

499 MCC: Mathew's correlation coefficient

500 MCFS: Monte carlo feature selection

501 NA: Neuraminidase

502 NEP: Nuclear export protein

503 NP: Nucleoprotein

504 NS1: Non structural protein 1

505 NS2: Non structural protein 2

506 PA: Polymerase acidic protein

507 PB1: Polymerase basic protein 1

508 PB2: Polymerase basic protein 2

509 Sn: Sensitivity

510 Sp: Specificity

## 511 **Competing interests**

512 We have no competing interests.

## 513 **Authors Contribution**

514 ZK has performed all computational experiments and together with JK was the main  
 515 contributor to the paper. MK and SB have contributed the idea to analyze the virus  
 516 data following the earlier work of JK. They contributed to writing the paper. JK  
 517 provided the computational methods, supervised the work and together with ZK was  
 518 the main contributor to the paper.

## 519 **Acknowledgements**

520 We would like to thank Husen Umer who provided valuable comments during various  
 521 stages of the work.

522 This research was supported by Uppsala University, Sweden, the ESSENCE grant,  
 523 (ZK and JK), JK was supported in part by Institute of Computer Science, Polish  
 524 Academy of Sciences, Poland. The EMIDA ERA-NET FP7 EU projects Epi-SEQ (nr.  
 525 219235), NADIV (nr. [ID 108](#)), the SLU Award of Excellence provided support to SB,  
 526 and the Swedish Research Council FORMAS Strong Research Environments project,  
 527 nr 2011-1692, “BioBridges”) to ML and SB.

## 528    **References**

- 529    1. Shi Y, Wu Y, Zhang W, Qi J, Gao GF. Enabling the 'host jump': structural  
530    determinants of receptor-binding specificity in influenza A viruses. *Nature reviews*  
531    *Microbiology*. 2014;12(12):822-31. doi:10.1038/nrmicro3362.
  
- 532    2. cdc. Influenza (Seasonal) Fact Sheet. 2014.  
533    <http://www.who.int/mediacentre/factsheets/fs211/en/>. Accessed 17 April 2015.
  
- 534    3. Taubenberger JK, Morens DM. Pandemic influenza--including a risk assessment of  
535    H5N1. *Revue scientifique et technique*. 2009;28(1):187-202.
  
- 536    4. Kilbourne ED. Influenza pandemics of the 20th century. *Emerging infectious*  
537    *diseases*. 2006;12(1):9-14. doi:10.3201/eid1201.051254.
  
- 538    5. Gamblin SJ, Skehel JJ. Influenza hemagglutinin and neuraminidase membrane  
539    glycoproteins. *The Journal of biological chemistry*. 2010;285(37):28403-9.  
540    doi:10.1074/jbc.R110.129809.
  
- 541    6. Tong S, Li Y, Rivailler P, Conrardy C, Castillo DA, Chen LM et al. A distinct  
542    lineage of influenza A virus from bats. *Proceedings of the National Academy of*  
543    *Sciences of the United States of America*. 2012;109(11):4269-74.  
544    doi:10.1073/pnas.1116200109.



- 545 7. Tong S, Zhu X, Li Y, Shi M, Zhang J, Bourgeois M et al. New world bats harbor  
546 diverse influenza A viruses. PLoS pathogens. 2013;9(10):e1003657.  
547 doi:10.1371/journal.ppat.1003657.
- 548 8. Reid AH, Fanning TG, Hultin JV, Taubenberger JK. Origin and evolution of the  
549 1918 "Spanish" influenza virus hemagglutinin gene. Proceedings of the National  
550 Academy of Sciences of the United States of America. 1999;96(4):1651-6.
- 551 9. Garten RJ, Davis CT, Russell CA, Shu B, Lindstrom S, Balish A et al. Antigenic  
552 and genetic characteristics of swine-origin 2009 A(H1N1) influenza viruses  
553 circulating in humans. Science. 2009;325(5937):197-201.  
554 doi:10.1126/science.1176225.
- 555 10. Matrosovich MN, Gambaryan AS, Teneberg S, Piskarev VE, Yamnikova SS,  
556 Lvov DK et al. Avian influenza A viruses differ from human viruses by recognition of  
557 sialyloligosaccharides and gangliosides and by a higher conservation of the HA  
558 receptor-binding site. Virology. 1997;233(1):224-34. doi:10.1006/viro.1997.8580.
- 559 11. Li OT, Chan MC, Leung CS, Chan RW, Guan Y, Nicholls JM et al. Full factorial  
560 analysis of mammalian and avian influenza polymerase subunits suggests a role of an  
561 efficient polymerase for virus adaptation. PloS one. 2009;4(5):e5658.  
562 doi:10.1371/journal.pone.0005658.
- 563 12. Subbarao EK, London W, Murphy BR. A single amino acid in the PB2 gene of  
564 influenza A virus is a determinant of host range. Journal of virology.  
565 1993;67(4):1761-4.

- 566 13. Qiang X, Kou Z. Prediction of interspecies transmission for avian influenza A  
567 virus based on a back-propagation neural network. Mathematical and Computer  
568 Modelling. 2010;52(11–12):2060-5.  
569 doi:<http://dx.doi.org/10.1016/j.mcm.2010.06.008>.
  
- 570 14. Wang J, Ma C, Kou Z, Zhou YH, Liu HL. Predicting transmission of avian  
571 influenza A viruses from avian to human by using informative physicochemical  
572 properties. International journal of data mining and bioinformatics. 2013;7(2):166-79.
  
- 573 15. Eng CL, Tong JC, Tan TW. Predicting host tropism of influenza A virus proteins  
574 using random forest. BMC medical genomics. 2014;7 Suppl 3:S1. doi:10.1186/1755-  
575 8794-7-S3-S1.
  
- 576 16. Taubenberger JK, Reid AH, Lourens RM, Wang R, Jin G, Fanning TG.  
577 Characterization of the 1918 influenza virus polymerase genes. Nature.  
578 2005;437(7060):889-93. doi:10.1038/nature04230.
  
- 579 17. Chen GW, Chang SC, Mok CK, Lo YL, Kung YN, Huang JH et al. Genomic  
580 signatures of human versus avian influenza A viruses. Emerging infectious diseases.  
581 2006;12(9):1353-60. doi:10.3201/eid1209.060276.
  
- 582 18. Chen GW, Shih SR. Genomic signatures of influenza A pandemic (H1N1) 2009  
583 virus. Emerging infectious diseases. 2009;15(12):1897-903.  
584 doi:10.3201/eid1512.090845.

- 585 19. Finkelstein DB, Mukatira S, Mehta PK, Obenauer JC, Su X, Webster RG et al.  
586 Persistent host markers in pandemic and H5N1 influenza viruses. *Journal of virology*.  
587 2007;81(19):10292-9. doi:10.1128/JVI.00921-07.
- 588 20. Allen JE, Gardner SN, Vitalis EA, Slezak TR. Conserved amino acid markers  
589 from past influenza pandemic strains. *BMC microbiology*. 2009;9:77.  
590 doi:10.1186/1471-2180-9-77.
- 591 21. Miotto O, Heiny AT, Albrecht R, Garcia-Sastre A, Tan TW, August JT et al.  
592 Complete-proteome mapping of human influenza A adaptive mutations: implications  
593 for human transmissibility of zoonotic strains. *PloS one*. 2010;5(2):e9025.  
594 doi:10.1371/journal.pone.0009025.
- 595 22. Hu YJ, Tu PC, Lin CS, Guo ST. Identification and chronological analysis of  
596 genomic signatures in influenza A viruses. *PloS one*. 2014;9(1):e84638.  
597 doi:10.1371/journal.pone.0084638.
- 598 23. Pawlak Z. Rough sets. *International Journal of Computer and Information*  
599 *Sciences*. 1982;11(5):341-56. doi:10.1007/BF01001956.
- 600 24. Draminski M, Rada-Iglesias A, Enroth S, Wadelius C, Koronacki J, Komorowski  
601 J. Monte Carlo feature selection for supervised classification. *Bioinformatics*.  
602 2008;24(1):110-7. doi:10.1093/bioinformatics/btm486.

- 603 25. Bornelov S, Marillet S, Komorowski J. Ciruvis: a web-based tool for rule  
604 networks and interaction detection using rule-based classifiers. BMC bioinformatics.  
605 2014;15:139. doi:10.1186/1471-2105-15-139.
- 606 26. Bialas KM, Desmet EA, Takimoto T. Specific residues in the 2009 H1N1 swine-  
607 origin influenza matrix protein influence virion morphology and efficiency of viral  
608 spread in vitro. PloS one. 2012;7(11):e50595. doi:10.1371/journal.pone.0050595.
- 609 27. Abed Y, Goyette N, Boivin G. Generation and characterization of recombinant  
610 influenza A (H1N1) viruses harboring amantadine resistance mutations.  
611 Antimicrobial agents and chemotherapy. 2005;49(2):556-9.  
612 doi:10.1128/AAC.49.2.556-559.2005.
- 613 28. He G, Qiao J, Dong C, He C, Zhao L, Tian Y. Amantadine-resistance among  
614 H5N1 avian influenza viruses isolated in Northern China. Antiviral research.  
615 2008;77(1):72-6. doi:10.1016/j.antiviral.2007.08.007.
- 616 29. Cheung CL, Rayner JM, Smith GJ, Wang P, Naipospos TS, Zhang J et al.  
617 Distribution of amantadine-resistant H5N1 avian influenza variants in Asia. The  
618 Journal of infectious diseases. 2006;193(12):1626-9. doi:10.1086/504723.
- 619 30. Ilyushina NA, Govorkova EA, Webster RG. Detection of amantadine-resistant  
620 variants among avian influenza viruses isolated in North America and Asia. Virology.  
621 2005;341(1):102-6. doi:10.1016/j.virol.2005.07.003.

- 622 31. Khaliq Z, Leijon M, Belak S, Komorowski J. A complete map of potential  
623 pathogenicity markers of avian influenza virus subtype H5 predicted from 11  
624 expressed proteins. BMC microbiology. 2015;15:128. doi:10.1186/s12866-015-0465-  
625 x.
- 626 32. Bao Y, Bolotov P, Dernovoy D, Kiryutin B, Zaslavsky L, Tatusova T et al. The  
627 influenza virus resource at the National Center for Biotechnology Information.  
628 Journal of virology. 2008;82(2):596-601. doi:10.1128/jvi.02005-07.
- 629 33. Edgar R. MUSCLE: multiple sequence alignment with high accuracy and high  
630 throughput. Nucleic Acids Research. 2004;32(5):1792-7.
- 631 34. Draminski M. Michal Draminski Home Page. 2014.  
632 <http://www.ipipan.waw.pl/~mdramins/software.htm>. Accessed December 10 2014.
- 633 35. Holm S. A simple sequentially rejective multiple test procedure. Scandinavian  
634 journal of statistics. 1979:65-70.
- 635 36. Bornelov S, Saaf A, Melen E, Bergstrom A, Torabi Moghadam B, Pulkkinen V et  
636 al. Rule-based models of the interplay between genetic and environmental factors in  
637 childhood allergy. PLoS One. 2013;8(11):e80080. doi:10.1371/journal.pone.0080080.
- 638 37. Folorunso S, Adeyemo A. Alleviating Classification Problem of Imbalanced  
639 Dataset. African Journal of Computing & ICT. 2013;6(2).

- 640 38. Bekkar M, Alitouche TA. IMBALANCED DATA LEARNING APPROACHES  
641 REVIEW. International Journal. 2013.
  
- 642 39. Øhrn A, Komorowski J, editors. ROSETTA: A Rough Set Toolkit for Analysis of  
643 Data. Proc. Third International Joint Conference on Information Sciences, Fifth  
644 International Workshop on Rough Sets and Soft Computing (RSSC'97); 1997 March  
645 1-5; Durham, NC, USA.
  
- 646 40. Komorowski J. Jan Komorowski's Bioinformatics Lab. 2014.  
647 <http://bioinf.icm.uu.se/> -> Repositories -> Rosetta. Accessed December 10 2014.
  
- 648 41. Komorowski J, Pawlak Z, Polkowski L, Skowron A. Rough sets: A tutorial.  
649 Rough fuzzy hybridization: A new trend in decision-making. 1999:3-98.
  
- 650 42. Komorowski J. Learning rule-based models - the rough set approach. In: Brahme  
651 A, editor. Comprehensive Biomedical Physics Elsevier; 2014.
  
- 652 43. Price MN, Dehal PS, Arkin AP. FastTree 2--approximately maximum-likelihood  
653 trees for large alignments. PloS one. 2010;5(3):e9490.  
654 doi:10.1371/journal.pone.0009490.
  
- 655 44. Smeenk CA, Wright KE, Burns BF, Thaker AJ, Brown EG. Mutations in the  
656 hemagglutinin and matrix genes of a virulent influenza virus variant, A/FM/1/47-MA,  
657 control different stages in pathogenesis. Virus research. 1996;44(2):79-95.

- 658 45. Liu T, Ye Z. Introduction of a temperature-sensitive phenotype into influenza  
659 A/WSN/33 virus by altering the basic amino acid domain of influenza virus matrix  
660 protein. *Journal of virology*. 2004;78(18):9585-91. doi:10.1128/JVI.78.18.9585-  
661 9591.2004.
  
- 662 46. Watanabe K, Handa H, Mizumoto K, Nagata K. Mechanism for inhibition of  
663 influenza virus RNA polymerase activity by matrix protein. *Journal of virology*.  
664 1996;70(1):241-7.
  
- 665 47. Akarsu H, Burmeister WP, Petosa C, Petit I, Muller CW, Ruigrok RW et al.  
666 Crystal structure of the M1 protein-binding domain of the influenza A virus nuclear  
667 export protein (NEP/NS2). *The EMBO journal*. 2003;22(18):4646-55.  
668 doi:10.1093/emboj/cdg449.
  
- 669 48. Liu W, Zou P, Ding J, Lu Y, Chen YH. Sequence comparison between the  
670 extracellular domain of M2 protein human and avian influenza A virus provides new  
671 information for bivalent influenza vaccine design. *Microbes and infection / Institut*  
672 *Pasteur*. 2005;7(2):171-7. doi:10.1016/j.micinf.2004.10.006.
  
- 673 49. Holsinger LJ, Lamb RA. Influenza virus M2 integral membrane protein is a  
674 homotetramer stabilized by formation of disulfide bonds. *Virology*. 1991;183(1):32-  
675 43.

- 676 50. Jackson D, Hossain MJ, Hickman D, Perez DR, Lamb RA. A new influenza virus  
677 virulence determinant: the NS1 protein four C-terminal residues modulate  
678 pathogenicity. *Proceedings of the National Academy of Sciences of the United States*  
679 *of America*. 2008;105(11):4381-6. doi:10.1073/pnas.0800482105.
  
- 680 51. Heikkinen LS, Kazlauskas A, Melen K, Wagner R, Ziegler T, Julkunen I et al.  
681 Avian and 1918 Spanish influenza A virus NS1 proteins bind to Crk/CrkL Src  
682 homology 3 domains to activate host cell signaling. *The Journal of biological*  
683 *chemistry*. 2008;283(9):5719-27. doi:10.1074/jbc.M707195200.
  
- 684 52. Min JY, Li S, Sen GC, Krug RM. A site on the influenza A virus NS1 protein  
685 mediates both inhibition of PKR activation and temporal regulation of viral RNA  
686 synthesis. *Virology*. 2007;363(1):236-43. doi:10.1016/j.virol.2007.01.038.
  
- 687 53. Hale BG, Kerry PS, Jackson D, Precious BL, Gray A, Killip MJ et al. Structural  
688 insights into phosphoinositide 3-kinase activation by the influenza A virus NS1  
689 protein. *Proceedings of the National Academy of Sciences of the United States of*  
690 *America*. 2010;107(5):1954-9. doi:10.1073/pnas.0910715107.
  
- 691 54. Hale BG, Jackson D, Chen YH, Lamb RA, Randall RE. Influenza A virus NS1  
692 protein binds p85beta and activates phosphatidylinositol-3-kinase signaling.  
693 *Proceedings of the National Academy of Sciences of the United States of America*.  
694 2006;103(38):14194-9. doi:10.1073/pnas.0606109103.



- 695 55. Melen K, Kinnunen L, Fagerlund R, Ikonen N, Twu KY, Krug RM et al. Nuclear  
696 and nucleolar targeting of influenza A virus NS1 protein: striking differences between  
697 different virus subtypes. *Journal of virology*. 2007;81(11):5995-6006.  
698 doi:10.1128/JVI.01714-06.
- 699 56. Pan C, Cheung B, Tan S, Li C, Li L, Liu S et al. Genomic signature and mutation  
700 trend analysis of pandemic (H1N1) 2009 influenza A virus. *PloS one*.  
701 2010;5(3):e9549. doi:10.1371/journal.pone.0009549.
- 702 57. Tamuri AU, Dos Reis M, Hay AJ, Goldstein RA. Identifying changes in selective  
703 constraints: host shifts in influenza. *PLoS computational biology*.  
704 2009;5(11):e1000564. doi:10.1371/journal.pcbi.1000564.
- 705 58. Lipatov AS, Yen HL, Salomon R, Ozaki H, Hoffmann E, Webster RG. The role  
706 of the N-terminal caspase cleavage site in the nucleoprotein of influenza A virus in  
707 vitro and in vivo. *Archives of virology*. 2008;153(3):427-34. doi:10.1007/s00705-  
708 007-0003-8.
- 709 59. Bussey KA, Desmet EA, Mattiaccio JL, Hamilton A, Bradel-Tretheway B, Bussey  
710 HE et al. PA residues in the 2009 H1N1 pandemic influenza virus enhance avian  
711 influenza virus polymerase activity in mammalian cells. *Journal of virology*.  
712 2011;85(14):7020-8. doi:10.1128/JVI.00522-11.
- 713 60. Desmet EA, Bussey KA, Stone R, Takimoto T. Identification of the N-terminal  
714 domain of the influenza virus PA responsible for the suppression of host protein  
715 synthesis. *Journal of virology*. 2013;87(6):3108-18. doi:10.1128/JVI.02826-12.

- 716 61. Jin H, Lu B, Zhou H, Ma C, Zhao J, Yang CF et al. Multiple amino acid residues  
717 confer temperature sensitivity to human influenza virus vaccine strains (FluMist)  
718 derived from cold-adapted A/Ann Arbor/6/60. *Virology*. 2003;306(1):18-24.
  
- 719 62. Xu C, Hu WB, Xu K, He YX, Wang TY, Chen Z et al. Amino acids 473V and  
720 598P of PB1 from an avian-origin influenza A virus contribute to polymerase activity,  
721 especially in mammalian cells. *The Journal of general virology*. 2012;93(Pt 3):531-  
722 40. doi:10.1099/vir.0.036434-0.
  
- 723 63. Mehle A, Doudna JA. Adaptive strategies of the influenza virus polymerase for  
724 replication in humans. *Proceedings of the National Academy of Sciences of the*  
725 *United States of America*. 2009;106(50):21312-6. doi:10.1073/pnas.0911915106.
  
- 726 64. Yamada S, Hatta M, Staker BL, Watanabe S, Imai M, Shinya K et al. Biological  
727 and structural characterization of a host-adapting amino acid in influenza virus. *PLoS*  
728 *pathogens*. 2010;6(8):e1001034. doi:10.1371/journal.ppat.1001034.
  
- 729 65. Bussey KA, Bousse TL, Desmet EA, Kim B, Takimoto T. PB2 residue 271 plays  
730 a key role in enhanced polymerase activity of influenza A viruses in mammalian host  
731 cells. *Journal of virology*. 2010;84(9):4395-406. doi:10.1128/JVI.02642-09.
  
- 732 66. Foeglein A, Loucaides EM, Mura M, Wise HM, Barclay WS, Digard P. Influence  
733 of PB2 host-range determinants on the intranuclear mobility of the influenza A virus  
734 polymerase. *The Journal of general virology*. 2011;92(Pt 7):1650-61.  
735 doi:10.1099/vir.0.031492-0.

- 736 67. Conenello GM, Zamarin D, Perrone LA, Tumpey T, Palese P. A single mutation  
737 in the PB1-F2 of H5N1 (HK/97) and 1918 influenza A viruses contributes to  
738 increased virulence. PLoS pathogens. 2007;3(10):1414-21.  
739 doi:10.1371/journal.ppat.0030141.
- 740 68. Burke DF, Smith DJ. A recommended numbering scheme for influenza A HA  
741 subtypes. PloS one. 2014;9(11):e112302. doi:10.1371/journal.pone.0112302.
- 742 69. Caton AJ, Brownlee GG, Yewdell JW, Gerhard W. The antigenic structure of the  
743 influenza virus A/PR/8/34 hemagglutinin (H1 subtype). Cell. 1982;31(2 Pt 1):417-27.
- 744 70. Brownlee GG, Fodor E. The predicted antigenicity of the haemagglutinin of the  
745 1918 Spanish influenza pandemic suggests an avian origin. Philosophical transactions  
746 of the Royal Society of London Series B, Biological sciences. 2001;356(1416):1871-  
747 6. doi:10.1098/rstb.2001.1001.

748

## 749 **Figure Legends**

750 **Figure 1. Mean accuracies of the classifiers from 10-fold cross validations.** The  
751 red bars are for the H1N1 subtype and cyan bars are for the H3N2 subtype.

752 **Figure 2. Performance of the rule-based models.** The figure shows how well the  
753 models perform from a classification point of view, which is shown in terms of  
754 Mathew's correlation coefficient (MCC) values when tested on its corresponding  
755 complete input data set for each protein model of both subtypes. A value of 1 means a  
756 perfect classification, 0 is for a prediction no better than random and -1 indicates a

757 total disagreement between predictions and observations. The red bars are for the  
758 H1N1 subtype and cyan bars are for the H3N2 subtype.

759 **Figure 3. Ciruvis diagrams of combinations from the rules of H1N1 models.**

760 Models having at least three combinations are shown. The outer circle shows the  
761 positions. The inner circle shows the position or positions to which the position of the  
762 outer circle is connected. The edges show these connections. The width and color of  
763 the edges are related to the connection score (low = yellow and thin, high = red and  
764 thick). The width of an outer position is the sum of all connections to it, scaled so that  
765 all positions together cover the whole circle [25].

766 **Figure 4. Ciruvis diagrams of combinations from the rules of H3N2 models.**

767 Models having at least three combinations are shown. The outer circle shows the  
768 positions. The inner circle shows the position or positions to which the position of the  
769 outer circle is connected. The edges show these connections. The width and color of  
770 the edges are related to the connection score (low = yellow and thin, high = red and  
771 thick). The width of an outer position is the sum of all connections to it, scaled so that  
772 all positions together cover the whole circle [25].

773 **Figure 5. Phylogeny of PB2 H3N2 protein of avian hosts annotated with top 5**

774 **avian rules form the PB2 H3N2 model.** Each sequences is represented by its  
775 GeneBank accession. The violet nodes mark the sequences that supports rule 1,2,3,4  
776 and 5, which are 91.4% of the total sequences. Similarly the DarkViolet nodes mark  
777 the sequences that support rule 1, 2, 3 and 4 but lacks support for rule 5, which are  
778 2.2% of the total sequences. The nodes with a LightBlue background are the new,  
779 unseen sequences. The unmarked nodes do not support the top 5 rules, and were  
780 either supporting rules other than the top 5 or were not classified by the models.

## 781 **Additional Files**

782 **Additional file 1: This file contains the lists of significant features that were**  
 783 **selected by MCFS for all the proteins of both subtypes.**

784 Format: XLSX, Size: 75Kb

785 **Additional file 2: This file contains the rule-based models for all the proteins of**  
 786 **both subtypes.**

787 Format: XLSX, Size: 42Kb

788 **Additional file 3: This file contains list of names of the unseen viral sequences for**  
 789 **both subtypes that were either miss-classified or could not be classified by the**  
 790 **rule-based models.**

791 Format: XLSX, Size: 11Kb

792 **Additional file 4: This file contains singular and combinatorial signatures from**  
 793 **the rules for both subtypes.**

794 Format: XLSX, Size: 75Kb

795 **Additional file 5: This file contains all the phylogeny trees marked with top 5**  
 796 **rules.** Each sequences is represented by its GeneBank accession. The nodes with a  
 797 LightBlue background are the new, unseen sequences. The unmarked nodes do not  
 798 support the top 5 rules, and were either supporting rules other than the top 5 or were  
 799 not classified by the models.

800 Format: PDF, Size: 7.3Mb

## 801 Tables

802 **Table 1: The training data.**

| Protein | Nr. of sequences for each subtype |       |       |       | Total Features | Features after MCFS |      |
|---------|-----------------------------------|-------|-------|-------|----------------|---------------------|------|
|         | H1N1                              |       | H3N2  |       |                | H1N1                | H3N2 |
|         | Avian                             | Human | Avian | Human |                |                     |      |
| HA      | 214                               | 5205  | 164   | 3715  | 628            | 115                 | 88   |
| NA      | 205                               | 3093  | 173   | 3412  | 517            | 93                  | 79   |
| NS1     | 150                               | 1258  | 150   | 1176  | 249            | 98                  | 85   |
| NEP     | 61                                | 407   | 54    | 299   | 124            | 31                  | 26   |
| NP      | 125                               | 839   | 93    | 773   | 506            | 61                  | 69   |
| M1      | 45                                | 467   | 42    | 355   | 275            | 18                  | 15   |
| M2      | 65                                | 461   | 64    | 503   | 98             | 25                  | 23   |
| PA      | 192                               | 1677  | 143   | 1358  | 726            | 65                  | 47   |
| PA-X    | 57                                | 164   | 45    | 244   | 252            | 28                  | 24   |
| PB1     | 171                               | 1654  | 132   | 1347  | 762            | 59                  | 33   |
| PB2     | 184                               | 1817  | 136   | 1297  | 776            | 52                  | 42   |
| PB1-F2  | 151                               | 224   | 112   | 737   | 101            | 64                  | 54   |

803

804 **Table 2: Rule-based model of HA protein for the H1N1 subtype**

| Rule                                 | Accuracy (%) | Support | Decision Coverage (%) |
|--------------------------------------|--------------|---------|-----------------------|
| IF P435=I THEN host=Human            | 99.9         | 5128    | 98.4                  |
| IF P200=S THEN host=Human            | 99.9         | 4052    | 77.8                  |
| IF P10=Y THEN host=Human             | 99.8         | 3998    | 76.7                  |
| IF P88=S THEN host=Human             | 99.9         | 3989    | 76.5                  |
| IF P6=V THEN host=Human              | 99.8         | 3936    | 75.5                  |
| IF P222=R THEN host=Human            | 99.9         | 3823    | 73.4                  |
| IF P220=T THEN host=Human            | 100.0        | 3584    | 68.8                  |
| IF P516=K THEN host=Human            | 99.9         | 1818    | 34.9                  |
| IF P200=P and P222=K THEN host=Avian | 91.3         | 229     | 97.7                  |
| IF P130=K THEN host=Avian            | 91.3         | 218     | 93.0                  |
| IF P2=E and P222=K THEN host=Avian   | 96.2         | 208     | 93.5                  |
| IF P137=A and P544=L THEN host=Avian | 96.1         | 205     | 92.1                  |
| IF P78=L and P435=V THEN host=Avian  | 97.1         | 204     | 92.5                  |
| IF P9=F THEN host=Avian              | 98.5         | 204     | 93.9                  |
| IF P6=F THEN host=Avian              | 98.2         | 169     | 77.6                  |
| IF P14=V THEN host=Avian             | 99.4         | 165     | 76.6                  |
| IF P173=T THEN host=Avian            | 98.7         | 158     | 72.9                  |

805 **Table 3: Performance of the rule-based models on the new, unseen data**

| Protein    | Human Sequences |                      | Avian Sequences |                      |
|------------|-----------------|----------------------|-----------------|----------------------|
|            | Total           | Correctly classified | Total           | Correctly classified |
| HA-H1N1    | 107             | 104                  | 2               | 2                    |
| HA-H3N2    | 72              | 72                   | 4               | 4                    |
| M1-H1N1    | 24              | 24                   | 0               | 0                    |
| M1-H3N2    | 7               | 7                    | 0               | 0                    |
| M2-H1N1    | 30              | 26                   | 1               | 1                    |
| M2-H3N2    | 21              | 15                   | 3               | 3                    |
| NA-H1N1    | 32              | 32                   | 2               | 1                    |
| NA-H3N2    | 45              | 45                   | 4               | 3                    |
| NP-H1N1    | 13              | 13                   | 1               | 1                    |
| NP-H3N2    | 7               | 7                    | 4               | 4                    |
| NS1-H1N1   | 30              | 30                   | 2               | 2                    |
| NS1-H3N2   | 18              | 18                   | 3               | 3                    |
| NEP-H1N1   | 11              | 11                   | 2               | 2                    |
| NEP-H3N2   | 7               | 7                    | 2               | 2                    |
| PAX-H1N1   | 17              | 13                   | 2               | 2                    |
| PAX-H3N2   | 6               | 6                    | 0               | 0                    |
| PA-H1N1    | 33              | 28                   | 2               | 2                    |
| PA-H3N2    | 23              | 23                   | 3               | 3                    |
| PB1F2-H1N1 | 2               | 2                    | 2               | 2                    |
| PB1F2-H3N2 | 8               | 7                    | 4               | 0                    |
| PB1-H1N1   | 27              | 27                   | 0               | 0                    |
| PB1-H3N2   | 19              | 19                   | 1               | 1                    |
| PB2-H1N1   | 28              | 28                   | 2               | 2                    |
| PB2-H3N2   | 15              | 15                   | 3               | 3                    |

806

807 **Table 4: Amino acid residues having the most interactions in the models of both subtypes.**

| Subtype | Protein | Positions          | Number of interactions |
|---------|---------|--------------------|------------------------|
| H1N1    | HA      | 222K               | 2                      |
|         | M1      | 121T               | 5                      |
|         | M2      | 14G                | 6                      |
|         | NEP     | 57S, 60S           | 2                      |
|         | PA      | 28P, 277S          | 3                      |
|         | PA-X    | 28P                | 4                      |
|         | PB1     | 179M, 741A         | 3                      |
|         | PB2     | 65E                | 3                      |
| H3N2    | M1      | 101R               | 2                      |
|         | M2      | 11T, 14G, 31S, 54R | 2                      |
|         | NEP     | 14M                | 4                      |
|         | PB1     | 212L               | 2                      |
|         | PB2     | 82N                | 6                      |

808

809 **Table 5: Novel singular aa positions associated to host adaptation**

| Protein | Novel singular positions                                                                            |
|---------|-----------------------------------------------------------------------------------------------------|
| HA      | 6,9,10,14,23,47,66,69,78,88,91,94,130,173,189,200,220,222,435,516                                   |
| M1      | 30,116,142,207,209                                                                                  |
| M2      | 13,16,31,36,43,51,54                                                                                |
| NA      | 16,18,19,23,30,40,42,44,46,47,74,79,147,150,157,166,232,285,341,344,351,369,372,389,397,435,437,466 |
| NP      | 31,53,98,146,444,450,498                                                                            |
| NS1     | 6,7,14,23,27,28,74,123,152,192,220,226                                                              |
| NS2     | 6,7,14,32,34,48,83,86                                                                               |
| PA      | 85,323,336,348,362,300                                                                              |

|       |                                                        |
|-------|--------------------------------------------------------|
| PAX   | 28,85,210,233                                          |
| PB1   | 12,54,59,113,175,212,339,435,576,586,587,619,709       |
| PB1F2 | 3,6,12,17,21,25,26,27,28,33,47,52,54,57,58,60,62,65,82 |
| PB2   | 54,65,354                                              |

810

811 **Table 6: Amino acid changes associated with host adaptation**

| H1N1    |          |       |       | H3N2    |          |       |       |
|---------|----------|-------|-------|---------|----------|-------|-------|
| Protein | Position | Avian | Human | Protein | Position | Avian | Human |
| HA      | 6        | F     | V     | HA      | 78       | R     | E     |
| NA      | 46       | P     | T     | NA      | 30       | A     | I     |
|         | 74       | L     | V     |         | 40       | N     | Y     |
| NP      | 100      | R     | I,V   |         | 44       | I     | S     |
| NS1     | 6        | I     | M     | NP      | 16       | G     | D     |
| NEP     | 6        | I     | M     | PA-X    | 28       | P     | L     |
| PB1-F2  | 58       | L     | -     | PA      | 28       | P     | L     |
| PB2     | 588      | A     | I     |         | 57       | R     | Q     |
|         |          |       |       | PB2     | 9        | D     | N     |
|         |          |       |       |         | 64       | M     | T     |

812

813 **Table 7: Performance of the H1N1 models on H3N2 data and vice versa.** Sensitivity is the ability to

814 correctly predict human sequences and specificity is the ability to correctly predict avian sequences where

815 1 means perfect prediction and 0 means no correct predictions. Mathew's correlation coefficient (MCC)

816 value is a measure of how well the model performs overall where 1 is perfect prediction, 0 is similar to

817 prediction by chance and -1 is total disagreement between observations and predictions. "na" means the

818 measure could not be calculated for the given model.

|                                | Protein | Sensitivity | Specificity | MCC    |
|--------------------------------|---------|-------------|-------------|--------|
| <b>H3N2 data - H1N1 models</b> | HA      | 1           | 0           | na     |
|                                | M1      | 1           | 0.895       | 0.941  |
|                                | M2      | 1           | 0.742       | 0.848  |
|                                | NA      | 1           | 0           | na     |
|                                | NP      | 1           | 0.891       | 0.938  |
|                                | NS1     | 1           | 0.745       | 0.849  |
|                                | NEP     | 1           | 0.642       | 0.776  |
|                                | PA-X    | 0           | 1           | na     |
|                                | PA      | 0.021       | 0.93        | -0.11  |
|                                | PB1-F2  | 0.023       | 1           | 0.056  |
|                                | PB1     | 0.563       | 0.909       | 0.302  |
|                                | PB2     | 0.979       | 0.949       | 0.873  |
| <b>H1N1 data - H3N2 models</b> | HA      | 0           | na          | na     |
|                                | M1      | 0.957       | 0.975       | 0.885  |
|                                | M2      | 0.987       | 0.766       | 0.804  |
|                                | NA      | 1           | 0           | -0.004 |
|                                | NP      | 0.363       | 0.984       | 0.251  |
|                                | NS1     | 0.365       | 0.993       | 0.236  |
|                                | NEP     | 0.027       | 1           | 0.06   |
|                                | PA-X    | 0.202       | 0.982       | 0.224  |
|                                | PA      | 0.247       | 0.995       | 0.177  |
|                                | PB1-F2  | 0.991       | 0.804       | 0.831  |
|                                | PB1     | 0.992       | 0.877       | 0.888  |
|                                | PB2     | 0.956       | 0.951       | 0.788  |

819



820 **Table 8: Amino acid positions discussed in literature from the models of both the subtypes for all**  
821 **proteins**

| Protein  | Positions                                      | Description                                                                                                                        |
|----------|------------------------------------------------|------------------------------------------------------------------------------------------------------------------------------------|
| M1       | 115,121,137                                    | Known signatures of host-adaptation [18, 21, 22]                                                                                   |
|          | 30,142,207,209                                 | Affecting viral production on mutation [26]                                                                                        |
|          | 121                                            | Affecting viral replication [44]                                                                                                   |
|          | 101                                            | Determinant of temperature sensitivity [45], located in a transcription inhibition site [46] and is also interacting with NEP [47] |
| M2       | 11,14,18,20,28,55,57,78,82,89,93               | Known signatures of host-adaptation [18, 21, 22, 48]                                                                               |
|          | 31                                             | S31N is a known marker for amantadine resistance [27-30]                                                                           |
|          | 18,20                                          | Lie next to 17,19 which forms a di-sulphide bond [49]                                                                              |
| NS1      | 18,21,22,53,60,70,81,112,114,171,215,227       | Known signatures of host-adaptation [19, 50, 17, 21, 22, 20]                                                                       |
|          | 215                                            | Required for Crk/CrL-SH3 binding [51]                                                                                              |
|          | 123                                            | Necessary for interaction with PKR, resulting in an inhibition of eIF2alpha phosphorylation [52]                                   |
|          | 95                                             | Along with others, has been shown to be necessary for binding p85beta and activating PI3K signaling [53, 54]                       |
|          | 220                                            | Part of nuclear localization signal 2 essential for the importin-alpha binding [55]                                                |
| NEP(NS2) | 57,60,70,107                                   | Known signatures of host-adaptation [17, 56, 18, 22, 21]                                                                           |
| NP       | 16,33,100,214,283,313,351,353,357,422          | Known signatures of host-adaptation [20, 18, 57, 19, 22, 21]                                                                       |
|          | 16                                             | D16G shown to decrease pathogenicity several fold [58]                                                                             |
| PA       | 28,55,57,65,256,268,277,356,382,400,409        | Known signatures of host-adaptation [19, 18, 20, 57, 22, 21]                                                                       |
|          | 85,336                                         | Residues 85I and 336M are deemed important for enhanced polymerase activity in mammalian cells [59]                                |
|          | 57,65,85                                       | Shown to be involved in suppressing the host cell protein synthesis during infection [60]                                          |
| PB1      | 52,179,216,298,327,336,361,375,581,741         | Known signatures of host-adaptation [57, 18, 21, 22, 16]                                                                           |
|          | 581                                            | Shown to be conferring temperature sensitivity to human influenza virus vaccine strains [61]                                       |
|          | 473                                            | Mutation at position 473 has been shown to decrease polymerase activity [62]                                                       |
| PB2      | 9,44,64,81,105,271,292,368,453,588,613,682,684 | Known signatures of host-adaptation [57, 18, 19, 22, 21]                                                                           |
|          | 591                                            | 591Q is known to mimic the effect of 627K [63, 64]                                                                                 |
|          | 271                                            | 271A shown to increase polymerase activity in mammalian cells [65]                                                                 |
|          | 271,588                                        | Also been shown to be host range determinants [66]                                                                                 |
|          | 16,23,42,66,70,73,76                           | Known signatures of host-adaptation [17, 22]                                                                                       |
| PB1-F2   | 66                                             | Linked with affecting pathogenicity [67]                                                                                           |
| NA       | 46,47,74,147,15                                | Under selection pressure with a shift of hosts from birds                                                                          |

|    |               |                                                                                                                                                                     |
|----|---------------|---------------------------------------------------------------------------------------------------------------------------------------------------------------------|
|    | 7,341,351     | to humans [57]                                                                                                                                                      |
|    | 344           | Calcium ion binds here that stabilizes the molecule (UniProt: Q9IGQ6).                                                                                              |
| HA | 2,6,9,10,14   | Signal peptide domain                                                                                                                                               |
|    | 88,173,220,22 | Position 71, 159, 206 and 208 of the fully-mature HA with H3-numbering [68]) are part of the antigenic sites Cb, Sb and Ca of the HA protein, respectively [69, 70] |

822

Mean accuracy of the 10-fold cross validations

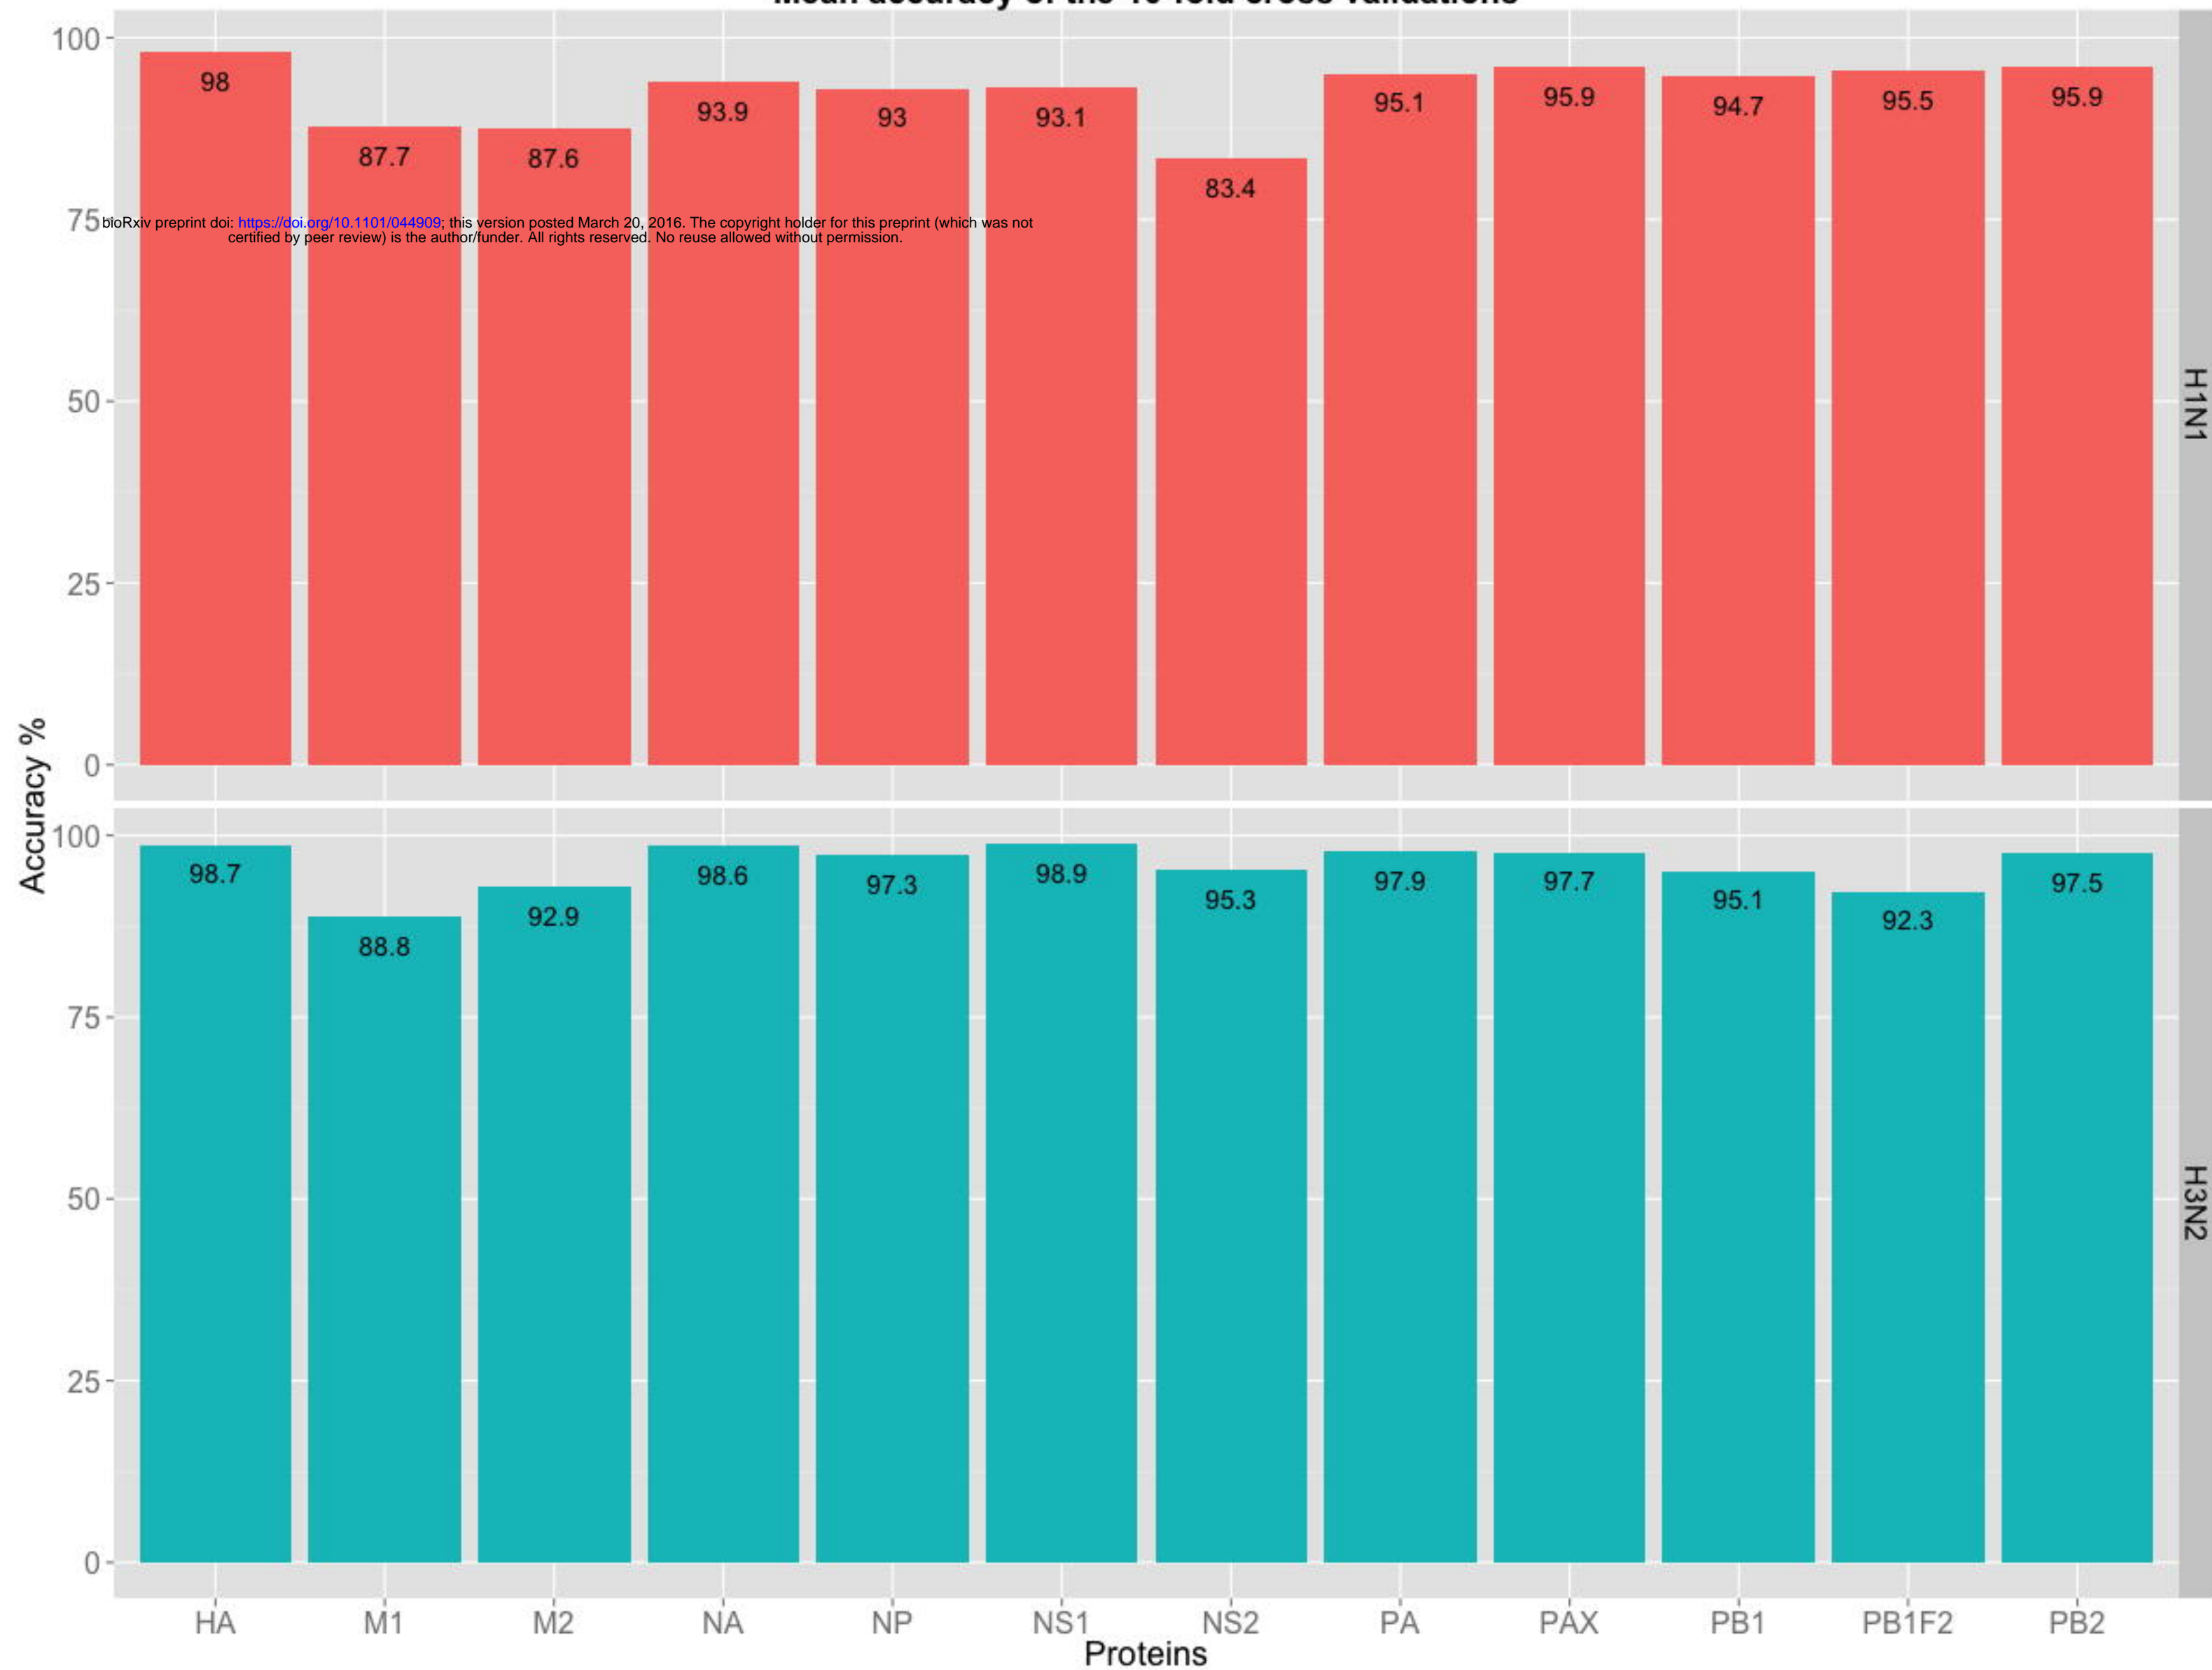

MCC on the complete input data sets

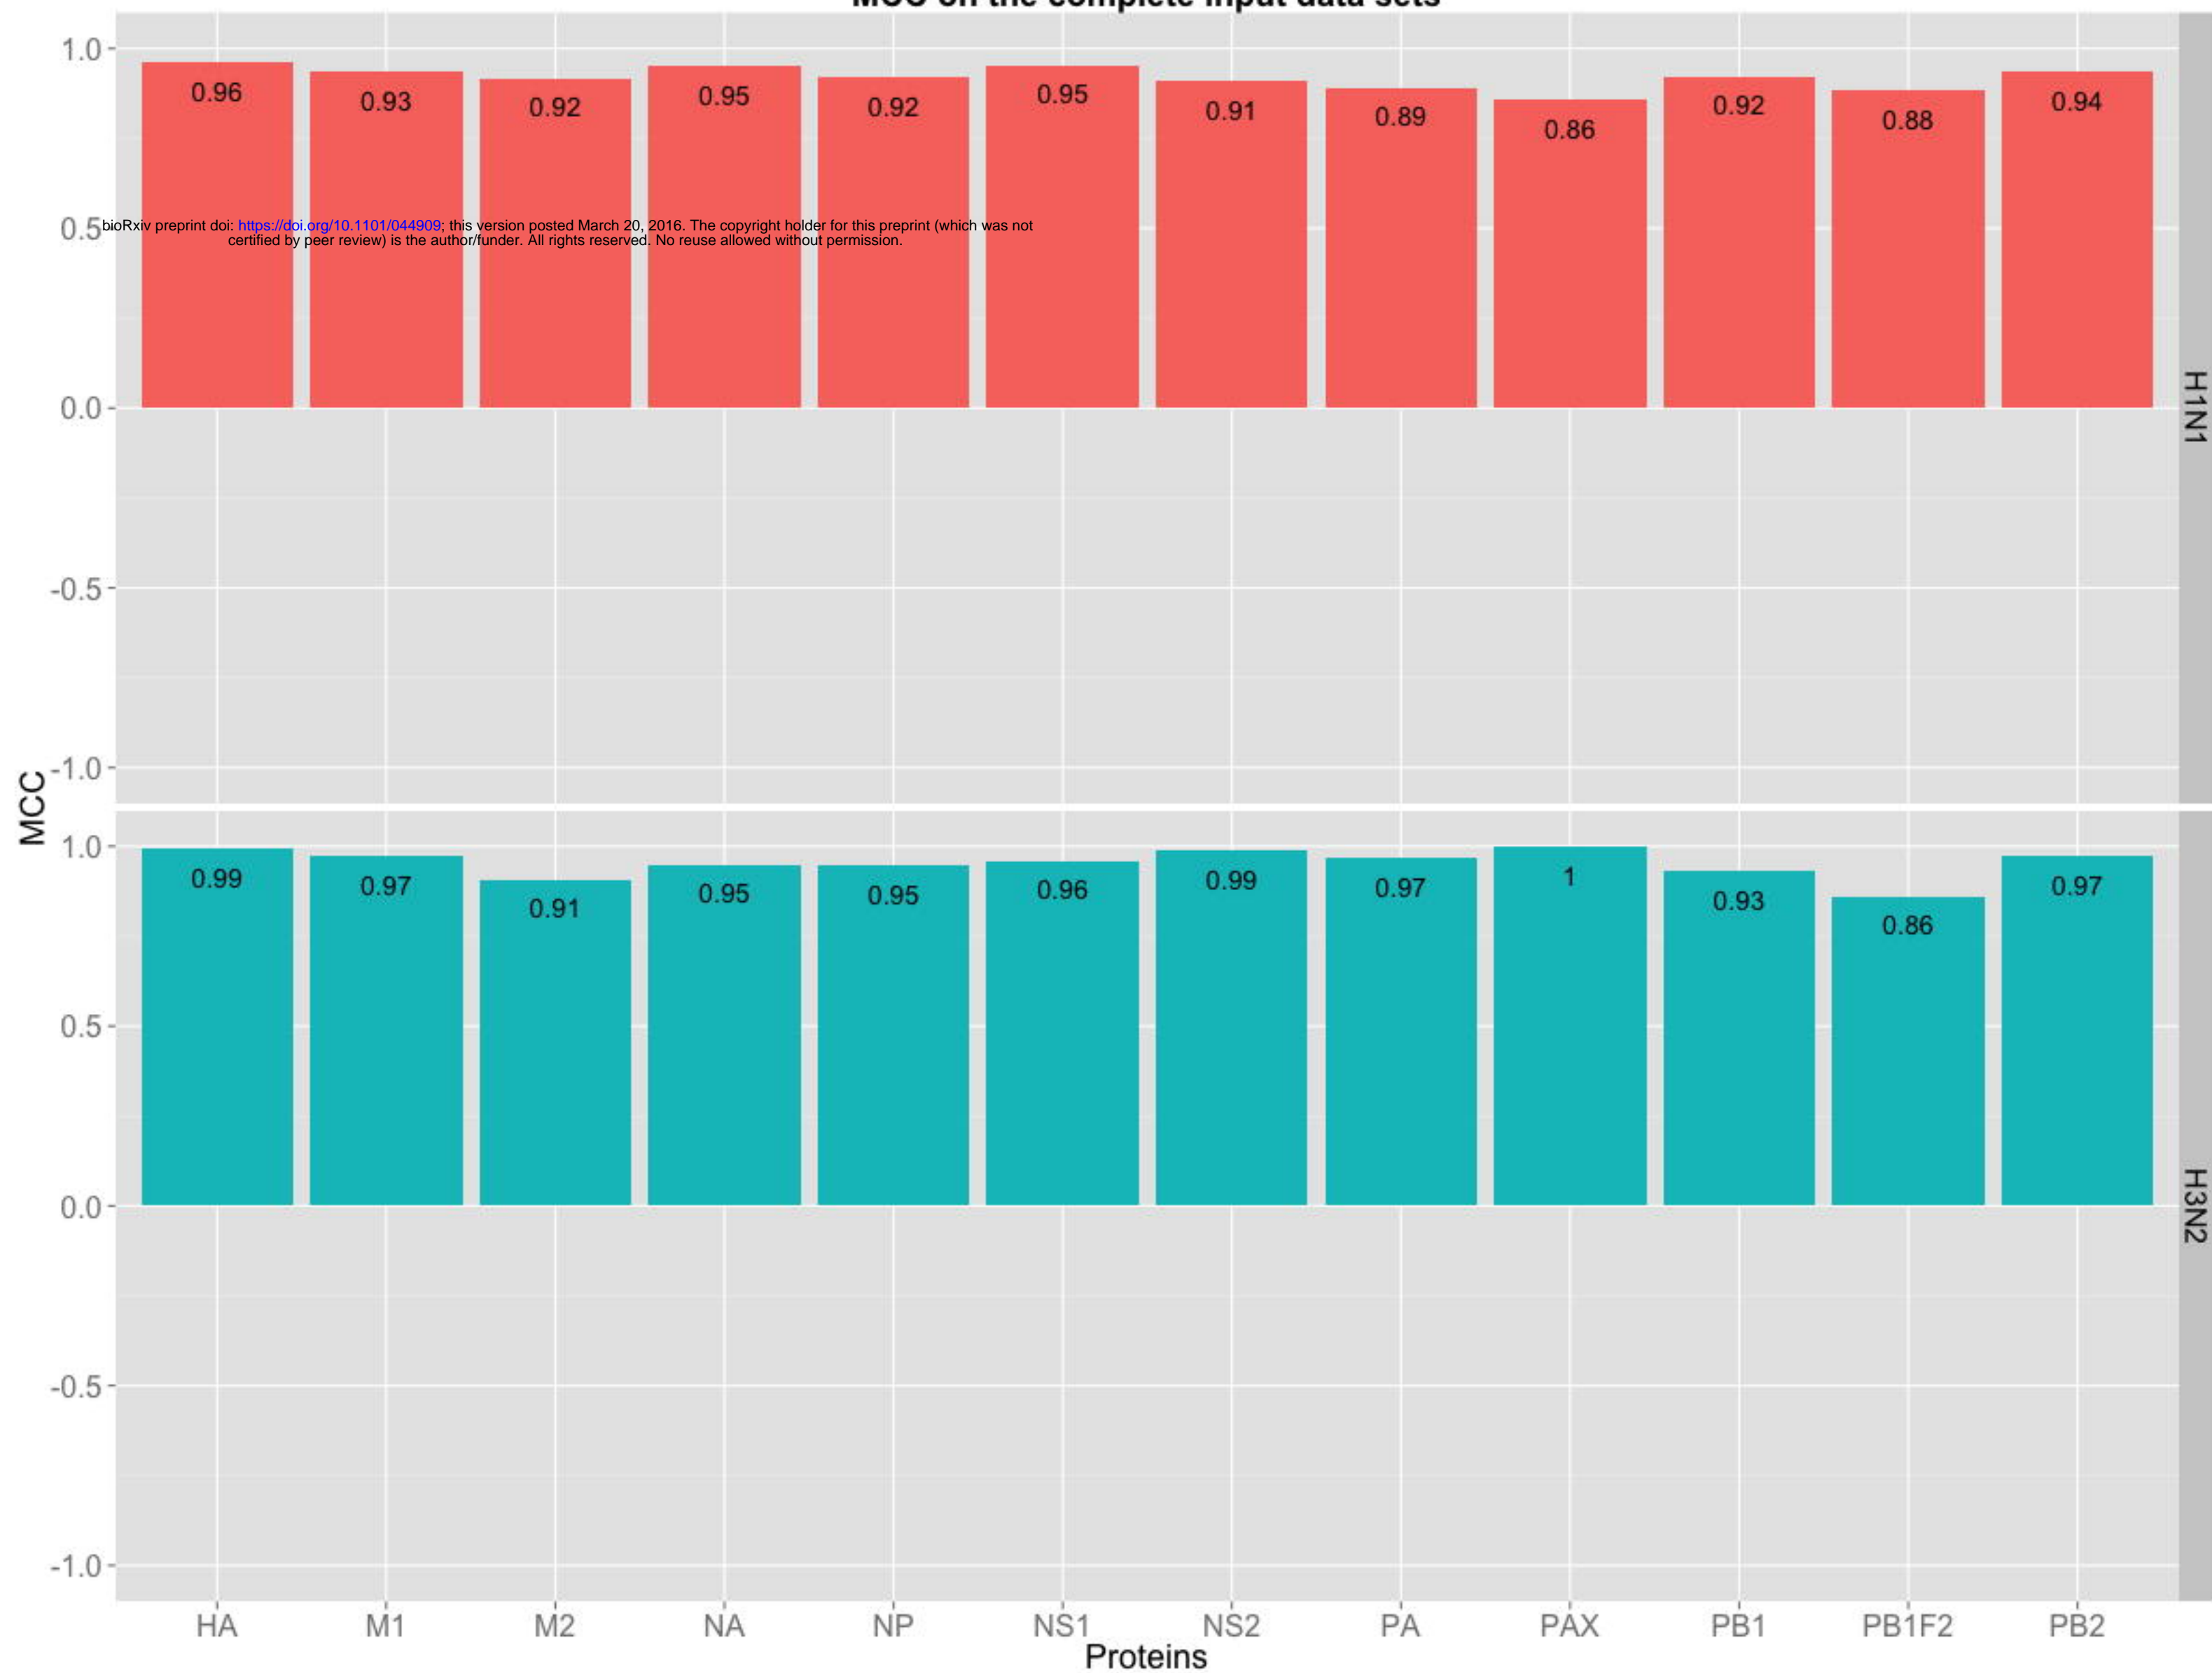

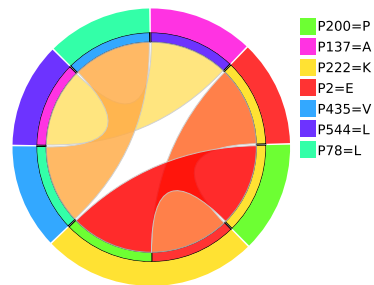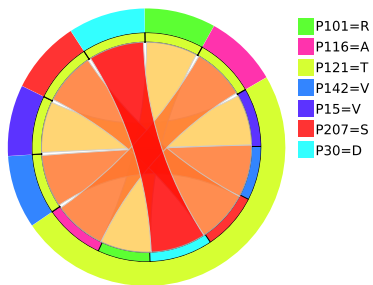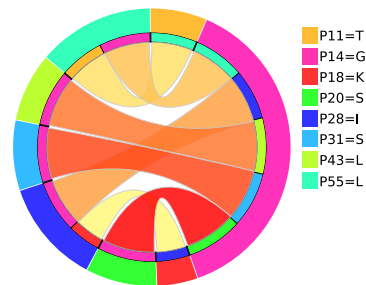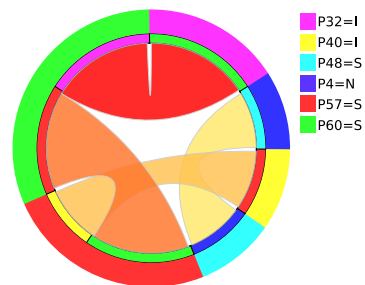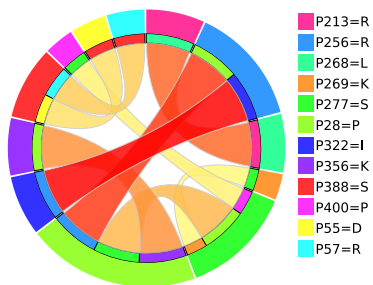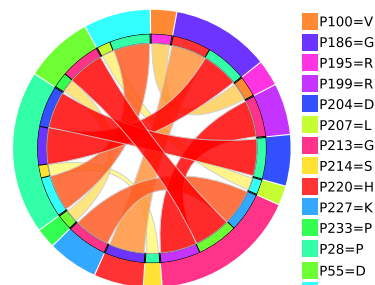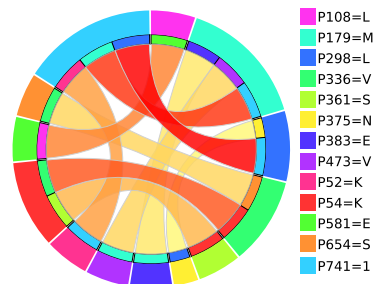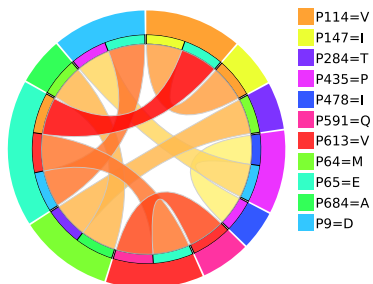

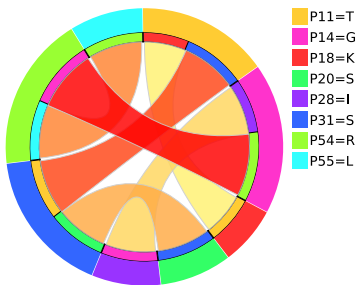

M2

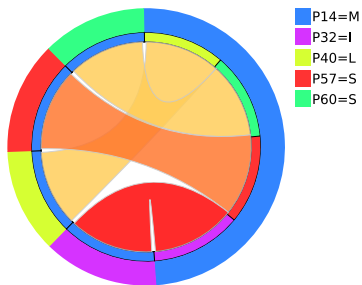

NEP

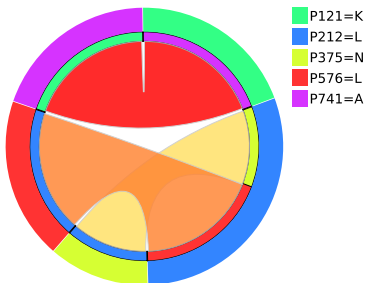

PB1

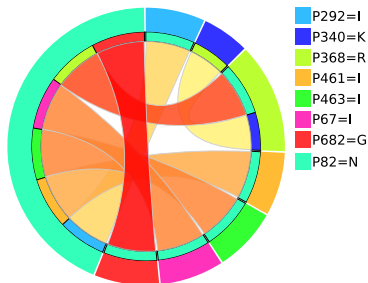

PB2

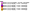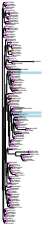

Source: http://biorxiv.org/content/10.1101/044909v1.full.pdf
